# Supplementary material for: Genome-Wide Association Mapping of Anther Extrusion in Hexaploid Spring Wheat
Source: PLOS journal article supplement (doi:10.1371/journal.pone.0155494), 2016-05-18
Supplement: S5 (10.1371/journal.pone.0155494.s005) [file journal.pone.0155494.s005]

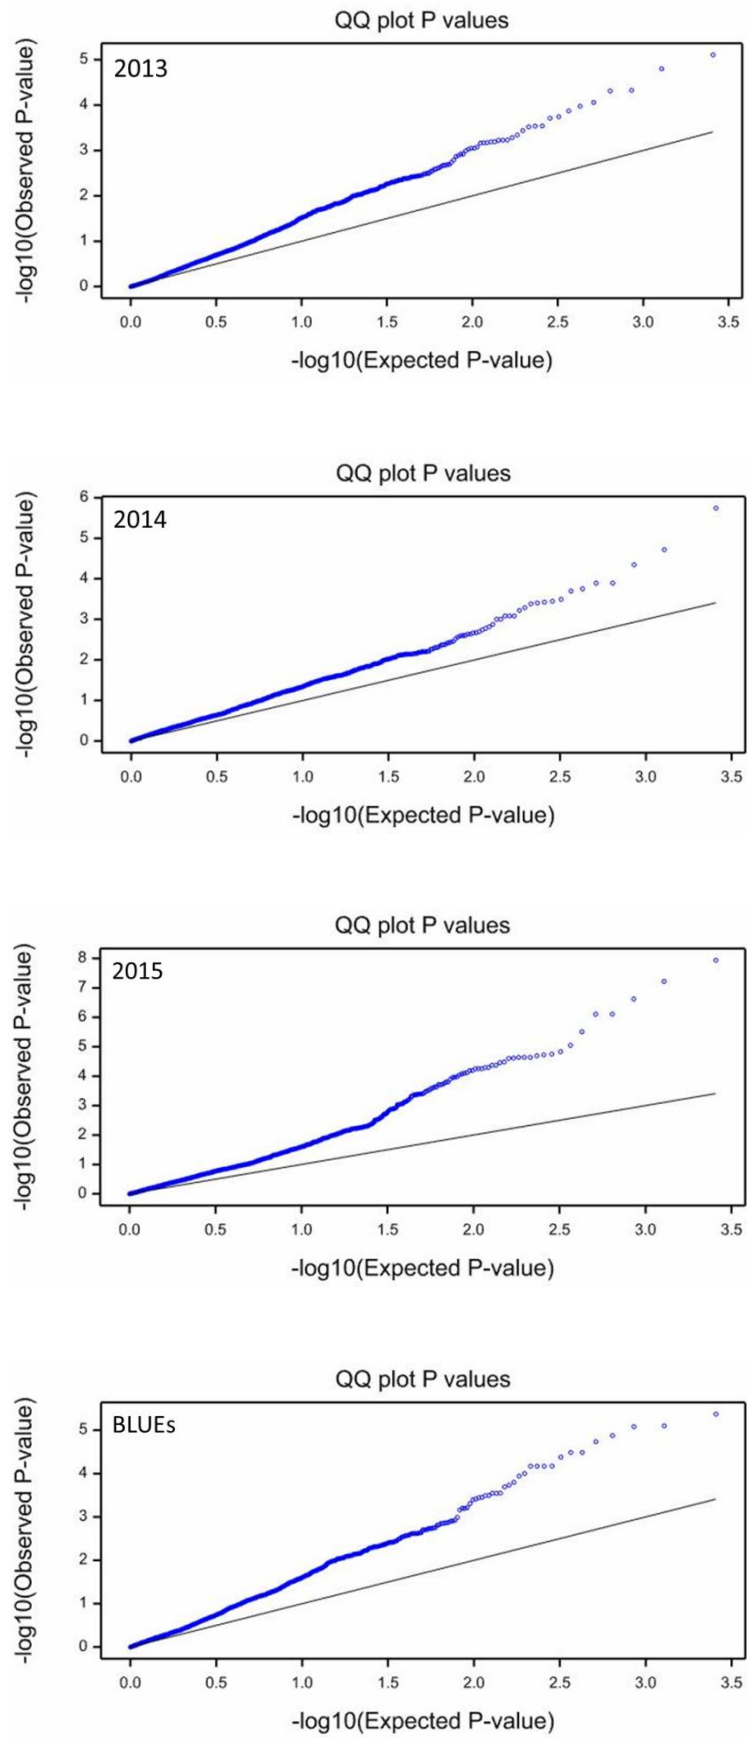

**S5 Fig.** Q-Q plots for each growing season and BLUE values, depicting expected vs observed  $|\log_{10}(P)|$  values.
