# Supplementary material for: Genome-Wide Association Mapping of Anther Extrusion in Hexaploid Spring Wheat
Source: PLoS One. 2016 May 18;11(5):e0155494. doi: 10.1371/journal.pone.0155494 (PMC4871436; doi:10.1371/journal.pone.0155494)
Supplement: S6 Table — (A). List of MTAs appeared in 2015 field based measurement of AE. (B). List of MTAs appeared in 2015 Lab based measurement of AE. (C). Comparison between two methods. (XLSX) [file pone.0155494.s012.xlsx]

## Sheet: S6 Table - (A)
S6 Table - (A). List of MTAs appeared in 2015 field based measurement of AE.
MTAs 2015-Field based method
Marker	Chromosome	Position	-log10(P)	Effect
wPt-733128	1A	36.9563	3.694	-1.9602
wPt-7784	1A	120.585	3.384	-2.9032
wPt-5367	1A	126.674	6.135	-2.4705
wPt-5801	1B	23.0943	3.766	-1.7266
wPt-5347	1B	23.333	4.882	-2.1395
wPt-741980	1B	23.333	4.57	-2.1081
wPt-5006	1B	23.7143	3.058	-1.5534
wPt-6592	1B	23.7143	3.955	-1.8856
wPt-1685	1D	unm	3.486	-1.7175
wPt-2839	1D	unm	4.412	-1.9183
wPt-3945	1D	unm	4.734	-2.0164
wPt-4427	1D	unm	4.634	-1.9741
wPt-4687	1D	unm	3.449	-1.6588
wPt-4711	1D	unm	4.836	-2.0423
wPt-4988	1D	unm	3.899	-1.7786
wPt-6560	1D	unm	3.944	-1.7844
wPt-7057	1D	unm	3.606	-1.71
wPt-7697	1D	unm	4.155	-1.8551
wPt-7957	1D	unm	4.868	-2.037
wPt-8545	1D	unm	4.681	-2.0136
wPt-1140	2B	75.5614	3.399	-2.3845
wPt-9997	2D	unm	3.572	-3.1313
tPt-3719	5B	72.41	4.993	-2.1461
wPt-1548	5B	72.41	5.883	-2.416
wPt-6971	5B	154.448	3.369	1.6572
wPt-732263	6A	48.2893	8.091	-4.1222
wPt-3130	6B	12.709	3.116	-1.5642
wPt-5114	6D	1.67632	3.652	-1.8244
wPt-664719	6D	1.67632	3.652	-1.8244
wPt-672044	6D	1.67632	3.652	-1.8244
wPt-2737	7B	unm	3.918	-3.1312
wPt-1695	unm	unm	3.475	-1.7965
wPt-665327	unm	unm	4.831	-2.0333
wPt-665360	unm	unm	5.111	-2.1164
wPt-665749	unm	unm	4.268	-1.8977
wPt-665961	unm	unm	4.52	-4.9458
wPt-666223	unm	unm	3.572	-3.1313
wPt-666963	unm	unm	4.394	-1.9437
wPt-668079	unm	unm	4.321	-1.9196
wPt-671947	unm	unm	4.432	-1.9307
wPt-729788	unm	unm	3.792	-1.8052
wPt-730475	unm	unm	4.6	-1.9911
wPt-730605	unm	unm	4.407	-1.925
wPt-730718	unm	unm	4.375	-1.9214
wPt-730879	unm	unm	3.778	-1.8243
wPt-731020	unm	unm	4.293	-1.9184
wPt-732575	unm	unm	4.422	-1.9263
wPt-732741	unm	unm	3.055	-1.9735
wPt-734132	unm	unm	4.588	-1.9772

## Sheet: S6 Table - (B)
S6 Table - (B). List of MTAs appeared in 2015 Lab based measurement of AE.
MTAs 2015-Lab based method
Marker	Chromosome	Position	-log10(P)	Effect
wPt-3904	1A	35.0042	4.29	-1.623
wPt-733128	1A	36.9563	3.119	-1.5609
wPt-3698	1A	44.1143	3.066	1.377
wPt-730408	1A	74.5304	3.061	1.3564
wPt-5367	1A	126.674	6.62	-2.2473
wPt-5347	1B	23.333	3.2	-1.4949
wPt-741980	1B	23.333	3.325	-1.5593
wPt-741094	1B	25.2681	3.127	-1.8726
wPt-8744	1B	25.6643	3.043	-1.7981
wPt-7066	1B	76.4643	3.372	-1.7597
wPt-1911	1B	unm	3.978	-2.9189
wPt-7460	1B	unm	3.535	-2.5959
wPt-1685	1D	unm	3.395	-1.4848
wPt-2839	1D	unm	3.805	-1.5541
wPt-3945	1D	unm	4.481	-1.7171
wPt-4427	1D	unm	4.293	-1.6613
wPt-4687	1D	unm	3.601	-1.4876
wPt-4711	1D	unm	4.751	-1.7721
wPt-4988	1D	unm	3.753	-1.5268
wPt-6560	1D	unm	3.801	-1.5326
wPt-7057	1D	unm	3.323	-1.433
wPt-7697	1D	unm	4.072	-1.6081
wPt-7957	1D	unm	4.723	-1.7564
wPt-8545	1D	unm	4.46	-1.72
wPt-6687	2A	108.935	3.139	-1.3762
wPt-1140	2B	75.5614	4.37	-2.3926
wPt-6643	2B	117.945	3.894	-1.6226
wPt-666464	2D	90.5352	3.721	-1.6308
wPt-9997	2D	unm	6.107	-3.6161
wPt-0714	3A	71.0161	3.633	-1.5021
wPt-745076	3A	71.0161	3.239	1.4334
wPt-741571	3B	65.4552	3.635	-1.4762
wPt-743775	3B	65.4552	3.37	1.4221
wPt-9310	3B	65.792	3.388	1.4075
wPt-9433	3B	65.792	3.388	1.4075
wPt-10033	3B	66.794	3.519	-1.4451
wPt-11024	3B	66.794	3.498	-1.4375
wPt-7142	3B	66.794	3.415	1.4189
wPt-731374	4A	106.906	3.184	-1.6487
wPt-666323	5B	42.133	3.586	-1.8958
tPt-3719	5B	72.41	4.254	-1.7299
wPt-1548	5B	72.41	4.834	-1.9154
wPt-732263	6A	48.2893	7.938	-3.5776
wPt-743435	6A	93.0604	3.029	-1.3379
wPt-1695	6A|6D	unm	5.047	-1.9202
wPt-5114	6D	1.67632	4.641	-1.8171
wPt-664719	6D	1.67632	4.641	-1.8171
wPt-672044	6D	1.67632	4.641	-1.8171
wPt-2737	7B	unm	5.508	-3.2707
wPt-664888	unm	unm	3.366	-2.0664
wPt-665327	unm	unm	4.617	-1.7403
wPt-665360	unm	unm	4.691	-1.7739
wPt-665749	unm	unm	4.254	-1.6603
wPt-665961	unm	unm	7.219	-5.4772
wPt-666223	unm	unm	6.107	-3.6161
wPt-666857	unm	unm	3.714	-2.8076
wPt-666963	unm	unm	3.954	-1.6103
wPt-667843	unm	unm	3.963	-3.102
wPt-668079	unm	unm	4.099	-1.6358
wPt-671947	unm	unm	4.118	-1.6272
wPt-6969	unm	unm	3.465	-3.0801
wPt-729788	unm	unm	3.401	-1.4907
wPt-730475	unm	unm	4.603	-1.7452
wPt-730605	unm	unm	4.187	-1.6423
wPt-730718	unm	unm	4.19	-1.645
wPt-730879	unm	unm	3.057	-1.4241
wPt-731020	unm	unm	4.038	-1.6272
wPt-732575	unm	unm	4.25	-1.6524
wPt-733383	unm	unm	3.712	-2.8146
wPt-734132	unm	unm	4.37	-1.6895
wPt-741749	unm	unm	3.035	-2.1904

## Sheet: S6 Table - (C)
S6 Table - (C). Comparison between two methods.
Marker	Chromosome	Position	log10(P) Field	log10 (P) Lab	Effect-Field	Effect-Lab
wPt-733128	1A	36.9563	3.694	3.119	-1.9602	-1.5609
wPt-5367	1A	126.674	6.135	6.62	-2.4705	-2.2473
wPt-5347	1B	23.333	4.882	3.2	-2.1395	-1.4949
wPt-741980	1B	23.333	4.57	3.325	-2.1081	-1.5593
wPt-1685	1D	unm	3.486	3.395	-1.7175	-1.4848
wPt-2839	1D	unm	4.412	3.805	-1.9183	-1.5541
wPt-3945	1D	unm	4.734	4.481	-2.0164	-1.7171
wPt-4427	1D	unm	4.634	4.293	-1.9741	-1.6613
wPt-4687	1D	unm	3.449	3.601	-1.6588	-1.4876
wPt-4711	1D	unm	4.836	4.751	-2.0423	-1.7721
wPt-4988	1D	unm	3.899	3.753	-1.7786	-1.5268
wPt-6560	1D	unm	3.944	3.801	-1.7844	-1.5326
wPt-7057	1D	unm	3.606	3.323	-1.71	-1.433
wPt-7697	1D	unm	4.155	4.072	-1.8551	-1.6081
wPt-7957	1D	unm	4.868	4.723	-2.037	-1.7564
wPt-8545	1D	unm	4.681	4.46	-2.0136	-1.72
wPt-1140	2B	75.5614	3.399	4.37	-2.3845	-2.3926
wPt-9997	2D	unm	3.572	6.107	-3.1313	-3.6161
tPt-3719	5B	72.41	4.993	4.254	-2.1461	-1.7299
wPt-1548	5B	72.41	5.883	4.834	-2.416	-1.9154
wPt-732263	6A	48.2893	8.091	7.938	-4.1222	-3.5776
wPt-5114	6D	1.67632	3.652	4.641	-1.8244	-1.8171
wPt-664719	6D	1.67632	3.652	4.641	-1.8244	-1.8171
wPt-672044	6D	1.67632	3.652	4.641	-1.8244	-1.8171
wPt-2737	7B	unm	3.918	5.508	-3.1312	-3.2707
wPt-1695	unm	unm	3.475	5.047	-1.7965	-1.9202
wPt-665327	unm	unm	4.831	4.617	-2.0333	-1.7403
wPt-665360	unm	unm	5.111	4.691	-2.1164	-1.7739
wPt-665749	unm	unm	4.268	4.254	-1.8977	-1.6603
wPt-665961	unm	unm	4.52	7.219	-4.9458	-5.4772
wPt-666223	unm	unm	3.572	6.107	-3.1313	-3.6161
wPt-666963	unm	unm	4.394	3.954	-1.9437	-1.6103
wPt-668079	unm	unm	4.321	4.099	-1.9196	-1.6358
wPt-671947	unm	unm	4.432	4.118	-1.9307	-1.6272
wPt-729788	unm	unm	3.792	3.401	-1.8052	-1.4907
wPt-730475	unm	unm	4.6	4.603	-1.9911	-1.7452
wPt-730605	unm	unm	4.407	4.187	-1.925	-1.6423
wPt-730718	unm	unm	4.375	4.19	-1.9214	-1.645
wPt-730879	unm	unm	3.778	3.057	-1.8243	-1.4241
wPt-731020	unm	unm	4.293	4.038	-1.9184	-1.6272
wPt-732575	unm	unm	4.422	4.25	-1.9263	-1.6524
wPt-734132	unm	unm	4.588	4.37	-1.9772	-1.6895
